# Supplementary material
Source: Springer Nature journal article supplement (https://www.springermedizin.de/resource/supplementary/12873_2012_154_MOESM1_ESM.pdf/9431518)

Kaplan-Meier survival estimates for the general population

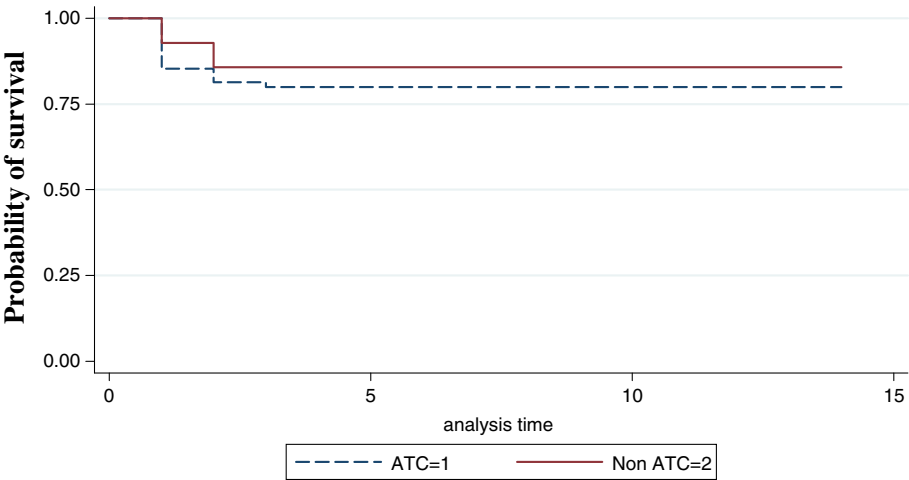

Supplement: MOESM1 [file 9431518]
